# Supplementary material
Source: PubMed Central journal article supplement (PMC3677209)
Supplement: NIHMS468175-supplement-01.pdf [file NIHMS468175-supplement-01.pdf]

## SUPPLEMENTARY ONLINE DATA

# Identification of novel small molecules that elevate Klotho expression

Gwendalyn D. KING<sup>\*1</sup>, CiDi CHEN<sup>\*</sup>, Mickey M. HUANG<sup>†</sup>, Ella ZELDICH<sup>\*</sup>, Patricia L. BRAZEE<sup>\*</sup>, Eli R. SCHUMAN<sup>†</sup>, Maxime ROBIN<sup>‡</sup>, Gregory D. CUNY<sup>†</sup>, Marcie A. GLICKSMAN<sup>†</sup> and Carmela R. ABRAHAM<sup>\*2</sup>

<sup>\*</sup>Boston University School of Medicine, Department of Biochemistry, 72 East Concord Street K304, Boston, MA 02118, U.S.A., <sup>†</sup>Laboratory for Drug Discovery in Neurodegeneration, Brigham & Women's Hospital and Harvard Medical School, 65 Landsdowne Street, 4th Floor, Cambridge, MA 02139, U.S.A., and <sup>‡</sup>Aix-Marseille Université Laboratoire Chimie Provence LCP-UMR CNRS 6264, Centre Saint Jérôme, Service 552, 13397 Marseille Cedex 20, France

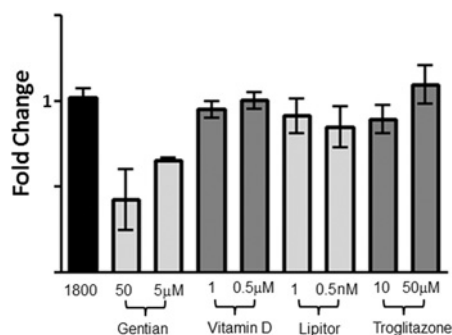

**Figure S1** Compounds that do not activate the *KL* promoter

Compounds reported to elevate levels of KL were tested to determine whether they activated *KL* transcription in our system. A plasmid containing 1800 bp of the *KL* promoter driving luciferase transcription was transiently transfected with a constitutively expressing *Renilla* reporter plasmid. After 24 h, compounds were added to fresh medium overlaying the cells. Luciferase output was determined 24 h later. Results are means  $\pm$  S.E.M. ( $n = 3$ ) expressed as fold change compared with the no treatment control (1800).

Received 23 November 2010/20 September 2011; accepted 22 September 2011  
 Published as BJ Immediate Publication 22 September 2011, doi:10.1042/BJ20101909

<sup>1</sup> Present address: Department of Neurobiology, University of Alabama at Birmingham, Shelby 911, 1825 University Boulevard, Birmingham, AL 35294-2182, U.S.A.

<sup>2</sup> To whom correspondence should be addressed (email cabraham@bu.edu).
